# Supplementary material
Source: MDPI journal article supplement (https://www.mdpi.com/2075-163X/13/12/1552)
Supplement: s1 [file s1 › minerals-2705167-supplementary.pdf]

## Supporting Information

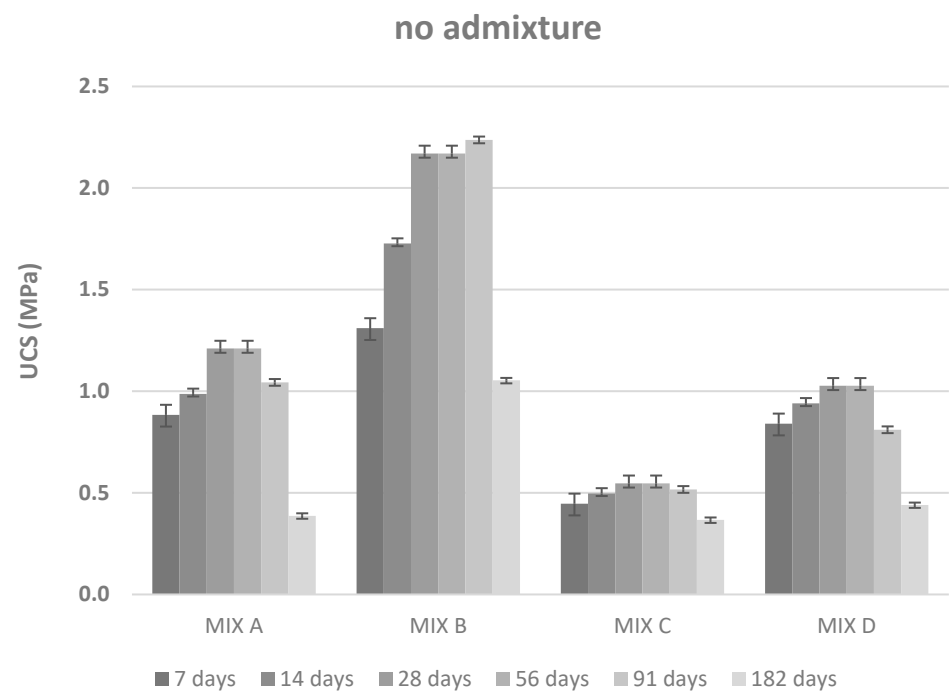

**Figure S1.** UCS at 7, 14, 28, 56, 91 and 182 days (respectively darker to lighter shades of grey) for MIX A (*top right*, 80% CEM I and 20% calcined clay CC1), MIX B (*top right*, 70% CEM I, 20% GGBFS slag, 10% calcined clay CC2), MIX C (*bottom left*, comprising LC<sup>3</sup>-35 comprising 35% CEM I and 40% calcined clay CC2) and a MIX D (*bottom right*, comprising LC<sup>3</sup>-65 mix design comprising 65% CEM I and 15% calcined clay CC3) for the reference with no admixture.
